# Supplementary material
Source: HighWire-hosted journal article supplement (https://www.genetics.org/content/suppl/2010/01/25/genetics.110.114017)
Supplement: FileS1.pdf [file FileS1.pdf]

**FILE S1****Supporting Materials and Methods**

**Sequence alignments:** We determined the reciprocal best-match BLAST hits between *Drosophila* and human cyclins (Table S1). BLAST searches were conducted with each of the *Drosophila* cyclins listed below to identify the top matching human cyclins. In cases where a gene had multiple protein isoforms, the longest isoform that had a cyclin domain was used. The top matching human proteins were then used in BLAST searches against the *Drosophila melanogaster* annotated proteins and the top matching protein was identified. Reciprocal best-match BLAST hits are listed in Table S1. An example of how reciprocal best-match hits are interpreted is as follows: Human CCND1, CCND2, and CCND3 are the human proteins most similar to *Drosophila* CycD, and *Drosophila* CycD is the *Drosophila* protein most similar to human CCND1, CCND2, or CCND3, according to BLAST. Multiple sequence alignment was performed using ClustalX version 2 (LARKIN *et al.* 2007; THOMPSON *et al.* 2002). Pair-wise percent identity was determined by dividing the number of identical sites in the alignment by the length of the alignment, including gaps and unaligned ends. The dendrogram shown in Figure S1A was constructed using ClustalX with the neighbor-joining algorithm. For Figure S1B, the reciprocal best-match BLAST hits between *Drosophila* CycY and proteins from several divergent species were aligned using ClustalW followed by manual corrections to improve identities. Only the top matching CycY-like protein from each species is shown. The proteins aligned were as follows, where Genbank accession numbers are in parentheses: *Aedes aegypti* hypothetical protein AaeL\_AAEL010543 (XP\_001660900.1); *Caenorhabditis elegans* hypothetical protein ZK353.1a (NP\_498858.2); *Danio rerio* hypothetical protein LOC767752 (NP\_001070188.1); *Drosophila melanogaster* CG14939-PA (NP\_609519.1); *Gallus gallus* CCNYL1 cyclin Y-like 1 (XP\_425973.2); *Homo sapiens* cyclin fold protein 1 variant b (AAL78999.1); *Mus musculus* cyclin fold protein 1 (NP\_080760.2); *Xenopus laevis* hypothetical protein LOC431857 (NP\_001084816.1); *Nematostella vectensis* predicted protein (XP\_001641126); *Trichoplax adhaerens* hypothetical protein (XP\_002116466); *Monosiga brevicollis* hypothetical protein (XP\_001750168).

To identify proteins with similarity to CycY in more distant species, reciprocal best-match BLAST hits between *Drosophila* CycY and proteins in the species listed below were determined. The identified proteins were also determined to be reciprocal best-match BLAST hits with the human *CCNY* protein. For all of the identified proteins the sequence similarity with the human or *Drosophila* CycY proteins was restricted to the annotated cyclin domain (MARCHLER-BAUER *et al.* 2009) and immediate flanking regions, referred to as the “cyclin+” region in Figure S2. The cyclin+ regions were aligned using ClustalW and a consensus sequence was determined by identifying residues that were found in >50% of the sequences (Figure S2A). The dendrogram shown in Figure S2B was obtained by aligning the cyclin+ region of the proteins most similar to CycY, and the annotated cyclin domains of reciprocal best-match hits of *Drosophila* CycA and CycB for the species shown. Only the top matching CycY-like protein from each species is shown; gene or genome duplications in some lineages have resulted in several

parologous CycY-like proteins (not shown). The following proteins from non-metazoan species were reciprocal best-match hits of *Drosophila* CycY or the human *CCNY* protein, where Genbank accession numbers are in parentheses: *Arabidopsis thaliana* CYCP4;3 (NP\_196362.1); *Coprinopsis cinerea* predicted protein (XP\_001832875); *Cryptococcus neoformans* cyclin (XP\_566770); *Dictyostelium discoideum* cyclin domain-containing protein (XP\_642568); *Giardia intestinalis* Cyclin fold protein 1 (EET00183.1); *Laccaria bicolor* predicted protein (XP\_001886042); *Medicago truncatula* unknown (ACJ84314); *Paramecium tetraurelia* hypothetical protein (XP\_001460214); *Perkinsus marinus* hypothetical protein (EER16009); *Phaeodactylum tricorutum* CYCP1 (XP\_002182703.1); *Phytophthora infestans* cyclin-Y-like (EEY67633.1); *Populus trichocarpa* predicted protein (XP\_002302113); *Ricinus communis* cyclin (XP\_002520742.1); *Saccharomyces cerevisiae* PCL1 (NP\_014110.1); *Tetrahymena thermophila* Cyclin, N-terminal domain containing protein (EAS05969); *Toxoplasma gondii* cyclin, N-terminal domain-containing protein (EEE19730); *Trypanosoma cruzi* cyclin 6 (AAG44389.1); *Tarowia lipolytica* hypothetical protein (XP\_505742).

**Yeast two-hybrid assays:** Yeast two-hybrid assays (FIELDS and SONG 1989) were performed using the LexA system (GYURIS *et al.* 1993) and interaction mating assays (FINLEY and BRENT 1994). Yeast strains and vectors, the protocol for one-on-one mating assays, and the reporter scoring methods were previously described (ZHONG *et al.* 2003). All of the cyclins tested were expressed as activation domain (AD) fusions, whereas all of the Cdks were expressed as DNA-binding domain (BD) fusions. AD and BD strains were obtained from the arrays of LexA-based yeast two-hybrid clones previously described (STANYON *et al.* 2004).

**Supporting References**

- BEAUSOLEIL, S. A., M. JEDRYCHOWSKI, D. SCHWARTZ, J. E. ELIAS, J. VILLEN *et al.*, 2004 Large-scale characterization of HeLa cell nuclear phosphoproteins. *Proc Natl Acad Sci U S A* **101**: 12130-12135.
- FIELDS, S., and O. SONG, 1989 A novel genetic system to detect protein-protein interactions. *Nature* **340**: 245-246.
- FINLEY, R. L., JR., and R. BRENT, 1994 Interaction mating reveals binary and ternary connections between *Drosophila* cell cycle regulators. *Proc Natl Acad Sci U S A* **91**: 12980-12984.
- FINN, R. D., J. MISTRY, J. TATE, P. COGGILL, A. HEGER *et al.*, 2009 The Pfam protein families database. *Nucleic Acids Res.*
- GYURIS, J., E. GOLEMIS, H. CHERTKOV and R. BRENT, 1993 Cdi1, a human G1 and S phase protein phosphatase that associates with Cdk2. *Cell* **75**: 791-803.
- JIANG, M., Y. GAO, T. YANG, X. ZHU and J. CHEN, 2009 Cyclin Y, a novel membrane-associated cyclin, interacts with PFTK1. *FEBS Lett* **583**: 2171-2178.
- LARKIN, M. A., G. BLACKSHIELDS, N. P. BROWN, R. CHENNA, P. A. MCGETTIGAN *et al.*, 2007 Clustal W and Clustal X version 2.0. *Bioinformatics* **23**: 2947-2948.
- MARCHLER-BAUER, A., J. B. ANDERSON, F. CHITSAZ, M. K. DERBYSHIRE, C. DEWEESE-SCOTT *et al.*, 2009 CDD: specific functional annotation with the Conserved Domain Database. *Nucleic Acids Res* **37**: D205-210.
- OLSEN, J. V., B. BLAGOEV, F. GNAD, B. MACEK, C. KUMAR *et al.*, 2006 Global, in vivo, and site-specific phosphorylation dynamics in signaling networks. *Cell* **127**: 635-648.
- STANYON, C. A., G. LIU, B. A. MANGIOLA, N. PATEL, L. GIOT *et al.*, 2004 A *Drosophila* protein-interaction map centered on cell-cycle regulators. *Genome Biol* **5**: R96.
- THOMPSON, J. D., T. J. GIBSON and D. G. HIGGINS, 2002 Multiple sequence alignment using ClustalW and ClustalX. *Curr Protoc Bioinformatics* **Chapter 2**: Unit 2.3.
- ZHAI, B., J. VILLEN, S. A. BEAUSOLEIL, J. MINTSERIS and S. P. GYGI, 2008 Phosphoproteome analysis of *Drosophila melanogaster* embryos. *J Proteome Res* **7**: 1675-1682.
- ZHONG, J., H. ZHANG, C. A. STANYON, G. TROMP and R. L. FINLEY, JR., 2003 A strategy for constructing large protein interaction maps using the yeast two-hybrid system: regulated expression arrays and two-phase mating. *Genome Res* **13**: 2691-2699.
