# Supplementary material
Source: HighWire-hosted journal article supplement (https://www.genetics.org/content/suppl/2010/01/25/genetics.110.114017)
Supplement: TableS2.pdf [file TableS2.pdf]

**TABLE S2**  
***CycY* and *Eip63E* mutants display variable expressivity<sup>a</sup>**

| Genotype <sup>b</sup>                                                       |   | L1  | w. L3 | P1  | P3  | P4  | P5  | P14 | P15 | A                |
|-----------------------------------------------------------------------------|---|-----|-------|-----|-----|-----|-----|-----|-----|------------------|
| <i>CycY<sup>EB</sup>/+</i>                                                  | n | 180 | 152   | 152 | 152 | 152 | 152 | 151 | 150 | 150              |
|                                                                             | % | 100 | 84    | 84  | 84  | 84  | 84  | 84  | 83  | 83               |
| <i>CycY<sup>EB</sup></i>                                                    | n | 180 | 162   | 162 | 162 | 158 | 110 | 74  | 23  | 15 <sup>c</sup>  |
|                                                                             | % | 100 | 90    | 90  | 90  | 88  | 61  | 41  | 13  | 8                |
| <i>CycY<sup>EB</sup>/+; P{CycY}</i>                                         | n | 200 | 180   | 180 | 180 | 180 | 180 | 180 | 180 | 180 <sup>d</sup> |
|                                                                             | % | 100 | 90    | 90  | 90  | 90  | 90  | 90  | 90  | 90               |
| <i>CycY<sup>EB</sup>; P{CycY}</i>                                           | n | 200 | 185   | 185 | 185 | 185 | 185 | 185 | 177 | 177 <sup>e</sup> |
|                                                                             | % | 100 | 93    | 93  | 93  | 93  | 93  | 93  | 89  | 89               |
| <i>CycY<sup>EB</sup>/+</i> and<br><i>Df(2L)Exel6030/+</i>                   | n | 200 | 187   | 187 | 187 | 187 | 187 | 187 | 174 | 174 <sup>f</sup> |
|                                                                             | % | 100 | 94    | 94  | 94  | 94  | 94  | 94  | 87  | 87               |
| <i>CycY<sup>EB</sup>/Df(2L)Exel6030</i>                                     | n | 200 | 186   | 186 | 186 | 182 | 144 | 88  | 31  | 19 <sup>g</sup>  |
|                                                                             | % | 100 | 93    | 93  | 93  | 91  | 72  | 44  | 16  | 10               |
| <i>CycY<sup>EB</sup>/+; P{CycY}</i> and<br><i>Df(2L)Exel6030/+; P{CycY}</i> | n | 200 | 178   | 178 | 178 | 178 | 178 | 178 | 177 | 177 <sup>h</sup> |
|                                                                             | % | 100 | 89    | 89  | 89  | 89  | 89  | 89  | 89  | 89               |
| <i>CycY<sup>EB</sup>/Df(2L)Exel6030</i><br>; <i>P{CycY}</i>                 | n | 200 | 179   | 179 | 179 | 179 | 179 | 179 | 176 | 176 <sup>i</sup> |
|                                                                             | % | 100 | 90    | 90  | 90  | 90  | 90  | 90  | 88  | 88               |
| <i>Eip63E<sup>GN50</sup>/+</i> and<br><i>Eip63E<sup>B1</sup>/+</i>          | n | 180 | 164   | 164 | 164 | 164 | 164 | 164 | 162 | 162              |
|                                                                             | % | 100 | 91    | 91  | 91  | 91  | 91  | 91  | 90  | 90               |
| <i>Eip63E<sup>GN50</sup>/Eip63E<sup>B1</sup></i>                            | n | 180 | 135   | 129 | 129 | 76  | 59  | 0   | 0   | 0                |
|                                                                             | % | 100 | 75    | 72  | 72  | 42  | 33  | 0   | 0   | 0                |

<sup>a</sup> 180 or 200 newly eclosed first instar larvae (L1) from each genotype were followed and the number that reached each stage, including wandering third instar larvae (w. L3), pupal stages (P1-P5, P14, and P15), and adults (A), was recorded.

<sup>b</sup> *P{CycY}* represents a genomic *CycY* transgene (Figure 1). In *CycY<sup>EB</sup>/+* and *Df(2L)Exel6030/+*, “+” stands for an *Act5C-GFP*-marked *CyO* balancer chromosome presumed to be wild type for *CycY*. In *Eip63E<sup>B1</sup>/+* and *Eip63E<sup>GN50</sup>/+*, “+” stands for an *Act5C-GFP*-marked *TM3, Ser* balancer chromosome presumed to be wild type for *Eip63E*.

<sup>c</sup> 13 out of the 15 *CycY<sup>EB</sup>* adults that eclosed had leg and wing defects and died quickly, while the remaining two were much smaller than their heterozygous siblings and died within two days.

<sup>d</sup> 3 out of the 180 *CycY<sup>EB</sup>/+; P{CycY}* adults were found dead on the food surface with the wing still folded and without other obvious morphological defects.

<sup>e</sup> 18 out of the 177 *CycY<sup>EB</sup>; P{CycY}* adults were found dead on the food surface with the wing still folded and without other obvious morphological defects.

<sup>f</sup> One out of the 174 *CycY<sup>EB</sup>/+* and *Df(2L)Exel6030/+* adults was found dead on the food surface with the wing still folded and without other obvious morphological defects.

<sup>g</sup> All of the 19 *CycY<sup>EB</sup>/Df(2L)Exel6030* adults that eclosed had leg and wing defects and died quickly.

<sup>h</sup> 6 out of the 177 *CycY<sup>EB</sup>/+; P{CycY}* and *Df(2L)Exel6030/+; P{CycY}* adults were found dead on the food surface with the wing still folded and without other obvious morphological defects.

<sup>i</sup> 13 out of the 176 *CycY<sup>EB</sup>/Df(2L)Exel6030; P{CycY}* adults were found dead on the food surface with the wing still folded and without other obvious morphological defects.
